# Supplementary material for: Five solvent-induced cadmium coordination polymers (CPs) based on the same mixed ligands
Source: Royal Society of Chemistry journal article supplement (doi:10.1039/c4ce01359j), 2014-08-26
Supplement: c4ce01359j1.pdf [file c4ce01359j1.pdf]

**Supporting information for**  
**Solvent induced five cadmium coordination polymers (CPs)**  
**based on the same mixed ligands**

Yuan-Feng Hou,<sup>a</sup> Bo Liu,<sup>a</sup> Ke-Fen Yue,<sup>\*a</sup> Ni Yan,<sup>a</sup> Chun-Sheng Zhou,<sup>b</sup> Yi-Meng Wang,<sup>b</sup>

Yao-Yu Wang<sup>a</sup>

<sup>a</sup>Key Laboratory of Synthetic and Natural Functional Molecule Chemistry of the Ministry of Education, College of Chemistry & Materials Science, Northwest University, Xi'an 710069, P. R. China.

<sup>b</sup>Department of Chemistry, Shang Luo University, Shang Luo 726000, P. R. China.

E-mail address: ykflyy@nwu.edu.cn

**Table of Content**

1. **Fig.S1** TGA curves for **1-5** measured under nitrogen.
2. **Fig.S2** PXRD patterns for **1(a)**, **2(b)**, **3(c)**, **4(d)** and **5(e)** recorded N<sub>2</sub> atmosphere.
3. **Table S1.** Selected bond distances (Å) and angles (°) for **1-5**.

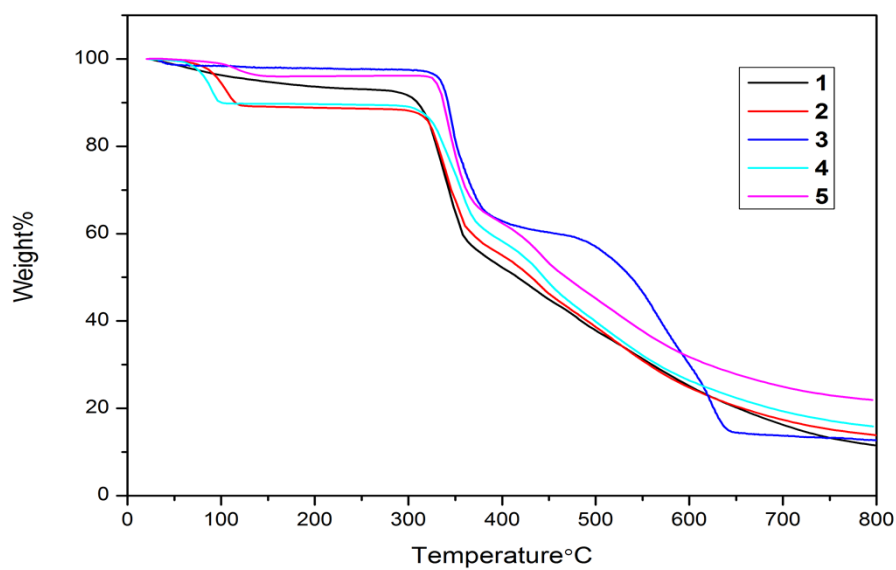

**Fig. S1** TGA curves of 1-5 under N<sub>2</sub> atmosphere

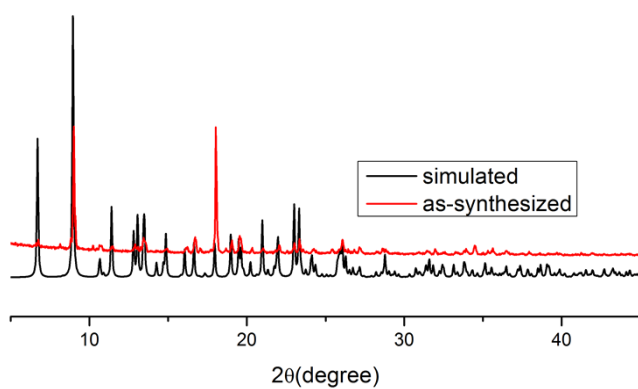

**1(a)**

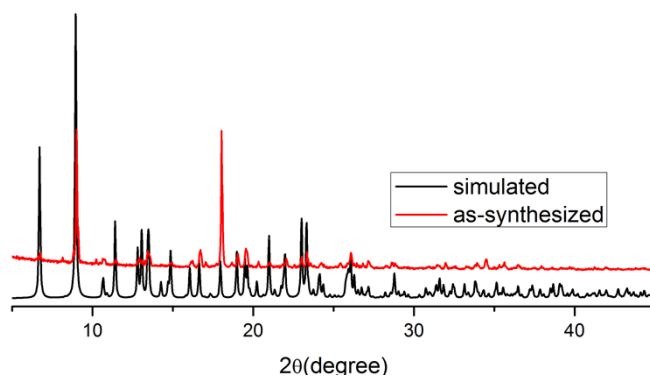

**2(b)**

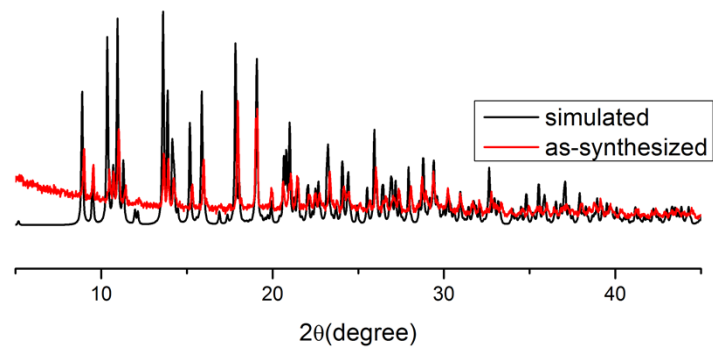

3(c)

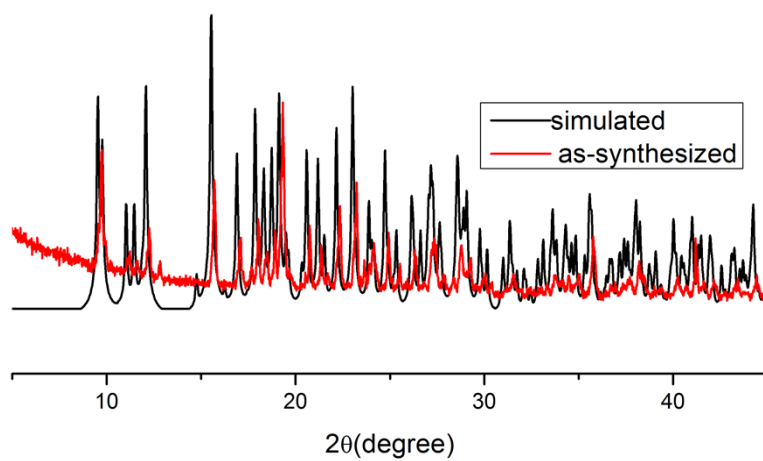

4(d)

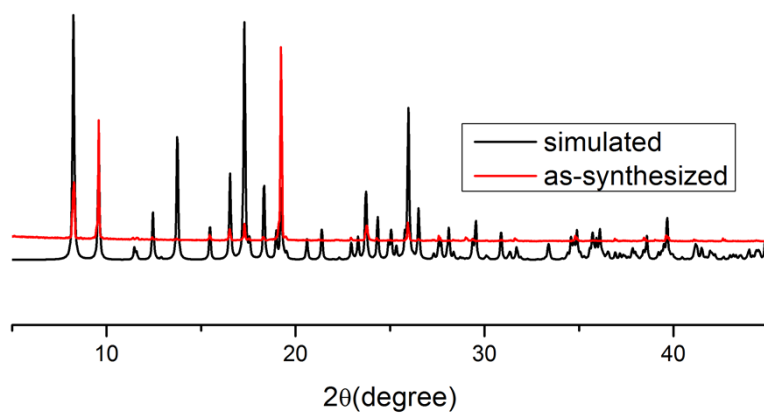

5(e)

**Fig. S2** PXRD patterns for 1(a), 2(b), 3(c), 4(d) and 5(e) recorded  $N_2$  atmosphere.

**Table S1.** Selected bond distances (Å) and angles (°) for **1-5**

| <b>Compound 1</b>   |           |                     |            |
|---------------------|-----------|---------------------|------------|
| Cd(1)-N(1)#1        | 2.258(7)  | O(4)-Cd(1)-O(3)#1   | 104.3(3)   |
| Cd(1)-N(1)          | 2.258(7)  | N(1)#1-Cd(1)-O(3)   | 140.2(2)   |
| Cd(1)-O(4)#1        | 2.368(7)  | N(1)-Cd(1)-O(3)     | 97.0(3)    |
| Cd(1)-O(4)          | 2.368(7)  | O(4)#1-Cd(1)-O(3)   | 104.3(3)   |
| Cd(1)-O(3)#1        | 2.415(7)  | O(4)-Cd(1)-O(3)     | 54.1(2)    |
| Cd(1)-O(3)          | 2.415(7)  | O(3)#1-Cd(1)-O(3)   | 86.3(4)    |
| Cd(2)-N(4)#2        | 2.275(7)  | N(4)#2-Cd(2)-N(4)#3 | 95.5(4)    |
| Cd(2)-N(4)#3        | 2.275(7)  | N(4)#2-Cd(2)-O(1)#4 | 104.6(3)   |
| Cd(2)-O(1)#4        | 2.363(7)  | N(4)#3-Cd(2)-O(1)#4 | 90.2(3)    |
| Cd(2)-O(1)          | 2.363(7)  | N(4)#2-Cd(2)-O(1)   | 90.2(3)    |
| Cd(2)-O(2)#4        | 2.395(7)  | N(4)#3-Cd(2)-O(1)   | 104.6(3)   |
| N(1)#1-Cd(1)-N(1)   | 104.9(4)  | O(1)#4-Cd(2)-O(1)   | 158.0(4)   |
| N(1)#1-Cd(1)-O(4)#1 | 109.6(3)  | N(4)#2-Cd(2)-O(2)#4 | 98.0(3)    |
| N(1)-Cd(1)-O(4)#1   | 87.1(2)   | N(4)#3-Cd(2)-O(2)#4 | 143.3(2)   |
| N(1)#1-Cd(1)-O(4)   | 87.1(2)   | O(1)#4-Cd(2)-O(2)#4 | 53.4(3)    |
| N(1)-Cd(1)-O(4)     | 109.6(3)  | O(1)-Cd(2)-O(2)#4   | 109.2(3)   |
| O(4)#1-Cd(1)-O(4)   | 153.1(3)  | O(4)#1-Cd(1)-O(3)#1 | 54.1(2)    |
| N(1)#1-Cd(1)-O(3)#1 | 97.0(3)   | N(1)-Cd(1)-O(3)#1   | 140.2(3)   |
| <b>Compound 2</b>   |           |                     |            |
| Cd(1)-O(2)#1        | 2.148(3)  | O(2)#1-Cd(1)-O(2)   | 119.4(2)   |
| Cd(1)-O(2)          | 2.148(3)  | O(2)#1-Cd(1)-N(1)#1 | 126.42(13) |
| Cd(1)-N(1)#1        | 2.234(3)  | O(2)-Cd(1)-N(1)#1   | 93.65(13)  |
| Cd(1)-N(1)          | 2.234(3)  | O(2)#1-Cd(1)-N(1)   | 93.65(13)  |
| N(1)#1-Cd(1)-N(1)   | 98.68(19) | O(2)-Cd(1)-N(1)     | 126.42(13) |
| <b>Compound 3</b>   |           |                     |            |
| Cd(1)-O(5)          | 2.219(8)  | O(5)-Cd(1)-N(1)     | 91.7(3)    |
| Cd(1)-N(1)          | 2.314(9)  | O(5)-Cd(1)-O(7)#1   | 96.5(3)    |
| Cd(1)-O(7)#1        | 2.325(8)  | N(1)-Cd(1)-O(7)#1   | 98.3(3)    |
| Cd(1)-O(1)          | 2.336(7)  | O(5)-Cd(1)-O(1)     | 89.3(3)    |
| Cd(1)-O(8)#1        | 2.364(7)  | N(1)-Cd(1)-O(1)     | 163.5(3)   |
| Cd(1)-O(3)#2        | 2.368(7)  | O(7)#1-Cd(1)-O(1)   | 97.9(3)    |
| Cd(2)-O(2)          | 2.213(7)  | O(5)-Cd(1)-O(8)#1   | 149.9(3)   |
| Cd(2)-N(3)          | 2.228(10) | N(1)-Cd(1)-O(8)#1   | 102.6(3)   |
| Cd(2)-O(6)          | 2.264(8)  | O(7)#1-Cd(1)-O(8)#1 | 55.7(3)    |
| Cd(2)-O(3)#2        | 2.290(7)  | O(1)-Cd(1)-O(8)#1   | 84.3(3)    |
| Cd(2)-O(9)          | 2.358(8)  | O(5)-Cd(1)-O(3)#2   | 111.3(3)   |
| Cd(2)-O(4)#2        | 2.648(7)  | N(1)-Cd(1)-O(3)#2   | 87.5(3)    |
| O(7)#1-Cd(1)-O(3)#2 | 151.5(3)  | O(1)-Cd(1)-O(3)#2   | 76.9(2)    |
| O(8)#1-Cd(1)-O(3)#2 | 95.9(3)   |                     |            |
| <b>Compound 4</b>   |           |                     |            |
| Cd(1)-N(1)          | 2.228(6)  | N(1)-Cd(1)-O(1)     | 132.5(2)   |
| Cd(1)-O(1)          | 2.264(5)  | N(1)-Cd(1)-O(1W)    | 92.5(2)    |

|                     |            |                     |            |
|---------------------|------------|---------------------|------------|
| Cd(1)-O(1W)         | 2.306(6)   | O(1)-Cd(1)-O(1W)    | 87.48(19)  |
| Cd(1)-O(2W)         | 2.356(6)   | N(1)-Cd(1)-O(2W)    | 93.2(2)    |
| Cd(1)-O(4)#1        | 2.402(5)   | O(1)-Cd(1)-O(2W)    | 86.77(18)  |
| Cd(1)-O(3)#1        | 2.469(5)   | O(1W)-Cd(1)-O(2W)   | 173.75(18) |
| N(1)-Cd(1)-O(4)#1   | 90.8(2)    | O(1)-Cd(1)-O(4)#1   | 136.72(18) |
| O(1W)-Cd(1)-O(4)#1  | 90.2(2)    | O(2W)-Cd(1)-O(4)#1  | 92.35(19)  |
| N(1)-Cd(1)-O(3)#1   | 143.6(2)   | O(1)-Cd(1)-O(3)#1   | 83.67(17)  |
| O(1W)-Cd(1)-O(3)#1  | 92.6(2)    | O(2W)-Cd(1)-O(3)#1  | 84.29(19)  |
| O(4)#1-Cd(1)-O(3)#1 | 53.27(17)  |                     |            |
| <b>Compound 5</b>   |            |                     |            |
| O(2)-Cd(1)#1        | 2.370(3)   | N(1)-Cd(1)-O(3)     | 136.26(13) |
| O(1)-Cd(1)#1        | 2.451(3)   | N(1)-Cd(1)-O(4)#2   | 89.79(11)  |
| Cd(1)-N(1)          | 2.265(3)   | O(3)-Cd(1)-O(4)#2   | 102.83(12) |
| Cd(1)-O(3)          | 2.325(3)   | N(1)-Cd(1)-O(2)#3   | 140.83(12) |
| Cd(1)-O(4)#2        | 2.365(3)   | O(3)-Cd(1)-O(2)#3   | 81.03(12)  |
| Cd(1)-O(2)#3        | 2.370(3)   | O(4)#2-Cd(1)-O(2)#3 | 92.51(12)  |
| Cd(1)-O(5)          | 2.370(3)   | N(1)-Cd(1)-O(5)     | 86.90(11)  |
| Cd(1)-O(1)#3        | 2.451(3)   | O(3)-Cd(1)-O(5)     | 80.15(12)  |
| O(4)#2-Cd(1)-O(5)   | 176.60(10) | O(2)#3-Cd(1)-O(5)   | 89.57(12)  |
| N(1)-Cd(1)-O(1)#3   | 86.97(13)  | O(3)-Cd(1)-O(1)#3   | 131.49(12) |
| O(4)#2-Cd(1)-O(1)#3 | 96.75(13)  | O(2)#3-Cd(1)-O(1)#3 | 53.92(12)  |
| O(5)-Cd(1)-O(1)#3   | 82.31(13)  |                     |            |

Symmetry transformations used to generate equivalent atoms: **For 1**, #1  $x, -y+1/2, -z+1/2$  #2  $-x-1/2, -y+1, z$  #3  $-x+1, -y+1, -z$ ; **For 2**, #1  $x, -y+3/2, -z+5/2$  #2  $x-1/2, y, -z+1$  #3  $-x, -y+2, -z+1$  #4  $-x-1/2, -y+2, z$ ; **For 3**, #1  $x, y+1, z$  #2  $x+1, y, z$  #3  $x-1, y, z$  #4  $x, y-1, z$  #5  $-x+3, -y+1, -z+1$  #6  $-x+1, -y, -z$ ; **For 4**, #1  $x+1/2, y+1/2, z$  #2  $x-1/2, y-1/2, z$  #3  $-x+2, y, -z+1/2$ ; **For 5**, #1  $-x+1, -y, -z+1$  #2  $x, y+1, z$  #3  $x, y-1, z$  #4  $-x+2, -y, -z$ .
